# 1            **Developmentally Delayed Epigenetic Reprogramming** 2            **Underlying the Pathogenesis of Preeclampsia**

3    Wei He<sup>1,2§</sup>, Yuan Wei<sup>3§</sup>, Xiaoli Gong<sup>3§</sup>, Luyuan Chang<sup>4§</sup>, Wan Jin<sup>4§</sup>, Ke Liu<sup>5§</sup>, Xinghuan Wang<sup>6,7,8,9§</sup>, Yu  
4    Xiao<sup>6,7,8,9</sup>, Wenjing Zhang<sup>4</sup>, Qiong Chen<sup>4</sup>, Kai Wu<sup>4</sup>, Lili Liang<sup>4</sup>, Jia Liu<sup>4</sup>, Yawen Chen<sup>4</sup>, Huanhuan Guo<sup>4</sup>,  
5    Xiaojuan Li<sup>4</sup>, Wenhao Chen<sup>4</sup>, Jiexia Yang<sup>2</sup>, Yiming Qi<sup>2</sup>, Yi Zhang<sup>4,10,11#</sup>, and Aihua Yin<sup>2#</sup>

6    1. The First Affiliated Hospital of Jinan University, Guangzhou, China;

7    2. Medical Genetic Center, Guangdong Woman and Children Hospital, Guangzhou, China;

8    3. Department of Obstetrics and Gynecology, Peking University Third Hospital, Beijing, China;

9    4. Euler Technology, Beijing, China;

10    5. Department of Medical Oncology, Changzheng Hospital, Naval Medical University, Shanghai, China;

11    6. Department of Urology, Zhongnan Hospital of Wuhan University, Wuhan, China;

12    7. Department of Biological Repositories, Zhongnan Hospital of Wuhan University, Wuhan, China;

13    8. Human Genetic Resources Preservation Center of Hubei Province, Wuhan, China;

14    9. Laboratory of Precision Medicine, Zhongnan Hospital of Wuhan University, Wuhan, China;

15    10. Peking-Tsinghua Center of Life Sciences, Beijing, China;

16    11. School of Life Sciences, Peking University, Beijing, China;

17  
18    § These authors contribute equally to the paper.

19    # Correspondence authors. Email: [yinaiwa@vip.126.com](mailto:yinaiwa@vip.126.com), [zy@eulertechnology.com](mailto:zy@eulertechnology.com).

20  
21    Word Count: Summary 199; Main Text 2505.

## 1 **Summary**

2 **Preeclampsia, a life-threatening pregnancy complication characterized by hypertension and**  
3 **multiorgan damage, affects 2-5% of pregnancies and causes 76,000 deaths per year. Most**  
4 **preeclampsia associated syndromes immediately dispel after removal of placenta, indicating**  
5 **a casual role of placenta in the pathogenesis. Failed transformation of spiral artery due to**  
6 **insufficient invasion and excessive apoptosis of trophoblast in preeclampsia placenta**  
7 **suggested developmental defects. However, the underlying molecular mechanisms that**  
8 **affected placenta development in preeclampsia remained elusive. Here we show that, in**  
9 **preeclampsia placenta, the bimodal epigenetic landscape formed during extraembryonic**  
10 **tissue differentiation was disrupted. ZGA-active NFYA/NFYB transcription factor binding**  
11 **were decreased, and NFY-bound LTR12 retrotransposons associated with VCT-specific**  
12 **genes were hypermethylated. Meanwhile, hundreds of EVT-specific gene promoters, which**  
13 **otherwise undergone *de novo* methylation in ExE, were hypomethylated and hyper-**  
14 **activated. DNA methylation defects were enriched on PcG-controlled loci in trophoctoderm,**  
15 **resulted in a developmentally delayed placenta in preeclampsia. The preeclampsia-placenta-**  
16 **like methylation landscape could be detected in serum cell-free DNA from preeclampsia**  
17 **pregnant females starting from 13w GA. Preeclampsia could be accurately predicted from**  
18 **cfDNA methylation in independent retrospective and prospective cohorts. Our data suggests**  
19 **that the preeclampsia placenta represents a stalled state of epigenetic reprogramming *en***  
20 ***route* of development from trophoctoderm to normal placenta.**

21

22

1 Dramatic epigenetic transformation occurs during human embryogenesis<sup>1-8</sup>. After zygote  
2 formation, the overall epigenome was turned into an open, transcriptionally permissive  
3 environment<sup>2</sup> by genome-wide removal of DNA methylation and H3K27me3 repressive mark<sup>1,3,7</sup>  
4 until zygote genome activation (ZGA) when repressive epigenetic modifications were re-  
5 established on lineage-specification genes by maternal and ZGA-active<sup>6,9,10</sup> transcription factor  
6 priming, polycomb group protein (PcG) binding<sup>11,12, 13,14,15,16</sup>, and *de novo* DNA methylation on  
7 CpG-island promoters<sup>17</sup>. In extraembryonic tissue (ExE), *de novo* methylation primes trophoblast  
8 cell lineage for implantation. Defective development of placenta results in failed transformation  
9 of spiral arteries caused by insufficient invasion of extravillous trophoblast (EVT) to the maternal  
10 uterus decidua<sup>18</sup> and excessive apoptosis of villous cytotrophoblast (VCT)<sup>19</sup>. The resulted  
11 insufficient supply of blood and hypoxia leads to reflective secretion of vasodilative factors such  
12 as s-FLT1 from placenta<sup>20</sup>, causing an avalanche of pathological events leading to hypertension  
13 and multiorgan failure in preeclampsia<sup>21</sup>. To understand how placenta development is disrupted  
14 in preeclampsia, we assessed single cell and bulk genome-wide DNA methylation, histone  
15 modification and chromatin accessibility from different stages of human embryonic development  
16 to placenta, including single gamete (sperm and oocyte), zygote, 2-cell stage, 4-cell stage, 8-cell  
17 stage, morula, inner cell mass and trophoctoderm from blastocyst stage, primed embryonic stem  
18 cells (ESC), trophoblast cells and preeclampsia- or non-preeclampsia placenta using a collection  
19 of data<sup>1-4,6,22-24</sup> (Extended Data Table S1).

20

21

## 1 **Chromatin accessibility and TFBS changes in preeclampsia placenta**

2 Global chromatin accessibility landscape differentiates placenta of preeclampsia pregnancy to  
3 normal ones (Extended Data Figure 1). Statistically significant difference on chromatin  
4 accessibility was identified on 3512 genomic loci, in which 1813 peaks are gain in preeclampsia  
5 (preeclampsia-gain) and 1698 are loss in preeclampsia (preeclampsia-loss) (Extended Data Table  
6 S2). These preeclampsia-specific, differentially regulated loci are particularly enriched for active  
7 TSS, CpG-islands, polycomb regulated regions and enhancers<sup>11,12</sup> (Figure 1a), suggesting a  
8 possibility that these regions were under control of DNA methylation<sup>25</sup>. Functionally, these loci  
9 are associated with known pathways for placenta development and function such as NOTCH3,  
10 VEGFA, MET, FOXO, ECM proteoglycan regulation, and coagulation (Figure 1b). Loci with  
11 significant chromatin accessibility changes are positioned in strategic locations for genes such as  
12 *PAPPA2*, *FLT1*, *LIFR*, *KDR*, *VEGFA* and *PGF* (Extended Data Figure 2), many of which were  
13 implicated in preeclampsia etiology as biomarkers<sup>20,26,27</sup>, conferred genetic susceptibility<sup>28-30</sup>, or  
14 with direct functional link<sup>31-35</sup>. These results are concordant to previous studies with RNA  
15 expression<sup>36,37</sup> and protein expression<sup>20,26</sup>.

16 Transcription factor footprinting analysis<sup>38,39</sup> shows that binding of NFYA and NFYB, two key  
17 transcription factors regulating zygotic genomic activation (ZGA)<sup>6,9</sup>, were down-regulated in  
18 preeclampsia placenta (Figure 1c-e), suggesting that ZGA might affect chromatin accessibility  
19 changes in preeclampsia. Consistently, peaks on preeclampsia-gain loci were usually found in pre-  
20 ZGA to early-ZGA embryonic stages, and preeclampsia-loss loci were more frequently found  
21 starting from early- to post-ZGA (Figure 1f), denoting a delayed evolution of epigenome  
22 landscape.

1

2 **Methylation changes in preeclampsia placenta correlated to polycomb binding site in**

3 **trophectoderm**

4 TSS and CpG islands, two main genomic elements regulated by DNA methylation, were enriched  
5 for ATAC-seq changes in preeclampsia. We went on to analyze genome-wide methylation from  
6 fetal and maternal surface of placentas. To this end, we identified 4,418 differentially methylated  
7 regions (DMR) spatially segregated on genome, in which 2710 are hypomethylated (preeclampsia-  
8 hypo) and 1271 are hypermethylated (preeclampsia-hyper) in preeclampsia placenta compared to  
9 normal (Extended Data Table S3 and Extended Data Figure 3). Preeclampsia-hypo DMR were  
10 spatially segregated, but preeclampsia-hyper DMR were scattered across the genome (Extended  
11 Data Figure 4a-c). DNA reads on DMR were classified into high-methylation (methylated) and  
12 low-methylation (demethylated) haplotype based on the overall methylation frequency they  
13 carried with a Gaussian mixture model. On most DMR, the difference between preeclampsia and  
14 normal placentas are dominated by one single class of methylation haplotype. These DMR are  
15 highly specific such that they could distinguish preeclampsia placenta from not only normal ones  
16 but also the ones with other pregnancy complications such as gestational hypertension, gestational  
17 diabetes, and twin-twin transfusion syndrome (Figure 2a).

18 ExE-specific *de novo* (*ExE-de-novo*) methylated regions were dominated by preeclampsia-hypo  
19 DMR. Specifically, the mammalian conserved ExE-de-novo methylated region (Extended Data  
20 Figure 5) which showed hypermethylation in both human cancer sample (Figure 2b) and  
21 preeclampsia placenta (Figure 2c). Furthermore, this argument holds true for human-specific ExE-  
22 de-novo methylated region (Figure 2d and 2e). On the contrary, preeclampsia-hyper DMR does

1 not distinguish cancer to normal samples (Figure 2f and 2g). Enrichment analysis showed that the  
2 preeclampsia-hyper DMR were enriched with retrotransposons with long terminal repeat (LTR)  
3 and preeclampsia-hypo DMR are associated with gene promoters (Extended Data Figure 6).  
4 Among retrotransposons, the primate-specific LTR12 family<sup>23</sup> were dominated by preeclampsia-  
5 hyper DMR (Figure 2h and 2i). Up to 30% of LTR12C and LTR12D retrotransposons contain  
6 preeclampsia-hyper DMR (Figure 2h), and most LTR12C-contained DMR are hypermethylated in  
7 preeclampsia placenta (Figure 2i and Extended Data Figure 7a). LTR12 was known to be  
8 hypomethylated in primate sperm<sup>23</sup> and is considered as a primate-specific innovation of  
9 imprinting. We found that human sperm hypomethylated LTR12 were invariably hypermethylated  
10 in preeclampsia (Extended Data Figure 7b).

11 To understand the underlying molecular mechanism of differential methylation in preeclampsia,  
12 we analyzed histone modification profiles on these preeclampsia-associated DMR using existing  
13 Cut-And-Run histone modification data from different embryonic stages<sup>2,4</sup>. H3K4me3  
14 modification on preeclampsia-associated DMR showed bimodal changes at early-ZGA stage  
15 (Figure 2j), with more H3K4me3-positive preeclampsia-hypermethylated regions (including  
16 LTR12C) and H3K4me3-negative preeclampsia-hypomethylated regions. The landscape of  
17 H3K4me3 on preeclampsia-hypermethylated regions were established with active transcription, as  
18 transcriptional blocking (TBE) halts the evolution of H3K4me3 modification pattern from 4-cell  
19 stage to 8-cell stage<sup>2</sup> (Figure 2j). On the other hand, for H3K27me3, bimodal changes were found  
20 in trophectoderm, with most preeclampsia-hypermethylated regions were H3K27me3-negative,  
21 and preeclampsia-hypomethylated regions were H3K27me3-positive (Figure 2k). These results  
22 suggest that DNA methylation defects in preeclampsia occurs on lineage-specifying genes under  
23 active regulation by PcG during placenta development.

## 1 **Preeclampsia-hypermethylated regions are associated with VCT/SCT-specific genes and** 2 **ZGA-active LTR12 retrotransposon**

3 Fetal extraembryonic tissue builds placenta by providing villous cytotrophoblast (VCT)<sup>40</sup> which  
4 forms the major structure of fetal face of placenta, and differentiates along divergent trajectories  
5 toward either syncytiotrophoblast (SCT)<sup>41</sup>, or extravillous trophoblast (EVT)<sup>41</sup>. Successful  
6 transformation of spiral artery requires coordinated, efficient generation of trophoblasts of both  
7 lineages. Using trophoblast single cell RNA sequencing data<sup>22</sup>, we built a pseudotime evolution  
8 trajectory of VCT towards EVT or SCT using DMR-associated genes (Figure 3a, inset) . Most  
9 preeclampsia-hyper DMR associated genes were highly expressed in VCT ( Figure 3a, large) and  
10 to a lesser extent SCT and decidua EVT, but not in the placental EVT, suggesting preeclampsia-  
11 hyper DMR might regulate VCT-specific or SCT-related genes. Concordant to this finding, on the  
12 fetal side of placenta, we found that the methylation haplotype frequency and overall methylation  
13 level of preeclampsia-hyper DMR, but not preeclampsia-hypo DMR, could differentiate placentas  
14 of preeclampsia pregnancy from normal ones (Figure 3b), suggesting the cell type enriched in fetal  
15 side of placenta as the major contributor of the methylated haplotypes in preeclampsia-hyper  
16 DMR. Together, these results suggest preeclampsia-hyper DMR might implicate in VCT (and  
17 SCT) function.

18 We used Monocle<sup>42</sup> to infer preeclampsia-hyper DMR associated gene expression level along the  
19 trophoblast differentiation trajectories (Figure 3c). By projecting cells on this pseudotime  
20 evolution trajectory, we found a subset of genes with associated LTR12C containing preeclampsia-  
21 hyper DMR were selectively expressed in VCT. During embryonic development, transcription  
22 from these LTR12C were selectively activated at ZGA (8-cell stage) (Figure 1f, and Figure 3d),  
23 whilst the NFYA/NFYB transcription factors<sup>6,9</sup> were most active and LTR12C were marked with

1 permissive histone marker H3K4me3 (Figure 2j). Methylation differences between preeclampsia-  
2 non-preeclampsia on these LTR12C elements were very similar (Figure 3d), with preeclampsia-  
3 specific hypermethylation at the 5' end of retrotransposon. These sites are devoid of methylation  
4 until early-ZGA stages (Extended Data Figure 7c and 7k). Hence, hypermethylation of these sites  
5 suggested a possibility that these retrotransposons were dysregulated before or during ZGA.

6 Many of the LTR12C hypermethylated in preeclampsia were with permissive histone mark in early  
7 ZGA and repressive histone mark re-established in trophectoderm (Figure 2j, 2k). For example, in  
8 *PAPPA2* (Extended Data Figure 7) *CDKN3* (Figure 3f) and *YY1* (Figure 3g), the adjacent  
9 hypermethylated LTR12C was active during 8-cell stage and repressed in trophectoderm.  
10 Analyzing chromatin interaction between the cognate promoters of these genes and the  
11 hypermethylated LTR12C showed an anti-correlation between LTR12C hypermethylation and  
12 transcriptional activation: *PAPPA2*, which is upregulated in preeclampsia<sup>26</sup> (Extended Data Figure  
13 7), is associated with a hypermethylated LTR12C in its adjacent transcriptional activation domain  
14 (TAD) as suggested by chromatin interaction frequency; in contrast, *CDKN3*<sup>43</sup> and *YY1*<sup>44</sup> which  
15 are downregulated in preeclampsia (Figure 3E, F) are associated with a hypermethylated LTR12C  
16 in their own TAD. These results suggest that preeclampsia-specific hypermethylation of LTR12C  
17 might result in down-regulation of transcriptional activity in the TAD, and up-regulates  
18 transcriptional activity in the adjacent TADs.

19 **Post-ZGA-active, embryonically protected CpG island promoters associated with EVT-**  
20 **specific genes were hypomethylated**

21 We used a similar strategy to locate the cell type(s) most affected by preeclampsia-hypo DMR.  
22 Preeclampsia-hypo DMR associated genes were exclusively expressed in EVT (Figure 4a),



1 without significant expression in either SCT or VCT. Meanwhile, methylation levels of  
2 preeclampsia-hypo DMR could differentiate the maternal side, but not fetal side, of preeclampsia  
3 placenta from normal ones (Figure 4b). Pseudotime model was built with Monocle to infer  
4 preeclampsia-hypo DMR associated gene expression level along the trophoblast differentiation  
5 trajectories (Figure 4c). In contrast to the preeclampsia-hyper DMR associated genes, many  
6 preeclampsia-hypo DMR associated genes such as *FLT1*, *FGFR3*, *E2F8* and *DOCK5* were  
7 selectively expressed in EVT only (Figure 4c). The preeclampsia-hypo DMR associated with these  
8 genes are generally located in the promoter or enhancer elements, and are closely associated with  
9 regions with preeclampsia-gain of chromatin accessibility (Extended Data Figure 8).

10 Preeclampsia-specific gains of chromosomal accessibility of these genes were exclusively found  
11 in placenta, but not earlier developmental stages (Extended Data Figure 9, and Figure 2),  
12 implicating that these chromatin openings formed no earlier than TE-to-ExE transition. Since ExE-  
13 specific *de novo* methylation of promoters is non-cell-autonomous<sup>17</sup>, preeclampsia-specific  
14 hypomethylation on these genomic loci implies a failure of *de novo* methylation during TE-to-ExE  
15 transition, which in turn suggests an early defect at the time of implantation<sup>17</sup>.

16 In all EVT-expressed genes, the preeclampsia-associated gene *FLT1* is of particular interest  
17 because it was biochemically<sup>20</sup> and genetically<sup>28</sup> linked to preeclampsia, and was found to be  
18 directly causing a preeclampsia-like phenotype in transgenic animal model downstream of  
19 endometrium VEGF<sup>33</sup>. We found preeclampsia-specific enhancers for *FLT1* by gain of chromatin  
20 accessibility and loss of DNA methylation on H3K27ac-marked loci (Figure 4d). These enhancer  
21 encompassed the known fetal genome susceptibility locus rs4769613 and rs12050029 for  
22 preeclampsia<sup>28</sup> and were conformationally linked to alternative *FLT1* promoters (Figure 4d).  
23 Moreover, these enhancers were marked with re-established H3K27me3 in trophectoderm (Figure

1 4e), suggesting that *FLT1* were directly targeted by PcG<sup>45</sup> during TE-to-ExE transformation and  
2 loss of such regulation may result in s-FLT1 overexpression (Figure 4f).

### 3 **Stalled epigenetic reprogramming of placenta in preeclampsia**

4 Together, we conclude that specific epigenomic changes in preeclampsia placenta occurs on  
5 lineage-specification related chromatin loci, leads to dysregulation of ZGA-active LTR12 family  
6 retrotransposon, and post-ZGA defect of TE-to-ExE transformation. These observations leads us  
7 to hypothesize that whether failed epigenetic reprogramming underlies the defective development  
8 of the preeclampsia placenta<sup>46</sup>. We tested this hypothesis by projecting placenta bulk methylation  
9 or ATAC sequencing results onto the evolution landscape built with single cell sequencing data.  
10 Mapping DNA methylation data positioned preeclampsia placenta along the innate developmental  
11 trajectory from trophoctoderm cells towards trophoblast, whilst normal placenta clustered with *ex*  
12 *vivo* induced trophoblast (differentiated cells derived from trophoctoderm) (Figure 5a). Similarly,  
13 using chromatin accessibility on DMR regions (Extended Data Figure 10), we found that unlike  
14 the normal placenta which clustered together with endogenous trophoblast, preeclampsia placenta  
15 was positioned along the trajectory from trophoctoderm towards trophoblast (Figure 5b).  
16 Altogether, these results suggest that preeclampsia placenta is developmentally delayed not only  
17 anatomically, but also epigenetically.

### 18 **In vivo evidence for the early stalled development of placenta from cell-free DNA**

19 So far, we draw analysis based on sequencing data from term placenta. Due to continuous post-  
20 implantation development, these data might not accurately reflect the epigenomic landscape at  
21 earlier gestational stages. Serum cell-free DNA (cfDNA) originated from apoptotic cells in human  
22 body<sup>47</sup>. In early stages of pregnancy, cfDNA from pregnant female contains DNA of fetal origin<sup>48</sup>,

1 which retains their original covalent chemical modification<sup>49,50</sup>. We hypothesized that sequencing  
2 cfDNA methylation profile from pregnant female, at very early gestational age, might be used to  
3 deduce the placental developmental status. If so, sequencing cfDNA methylation profile at early  
4 gestational weeks might predict pregnancy outcome.

5 We sequenced the DNA methylation profiles on preeclampsia-associated DMR from cell-free  
6 DNA from 15-20w GA (gestational age) blood draws of 20 pregnant females and 10 nongravid  
7 females. Analyzing the methylation haplotypes carried by sequencing reads showed that normal-  
8 placenta associated (Figure 6a) methylation haplotype on these DMR could be readily detected in  
9 cfDNA of female of normal, but not preeclampsia, pregnancy (Figure 6a). Similarly, preeclampsia-  
10 placenta associated methylation haplotypes could be only detected in samples from pregnancy  
11 females who latter developed preeclampsia (Figure 6b and 6c). Because these methylation  
12 haplotypes were never observed in nongravid female, they represent placenta-specific biomarkers  
13 which could be used to non-invasively track placental development.

14 To validate that early gestational week cfDNA methylation profile could be used to predict  
15 preeclampsia in later stage, we conducted a double-blinded, retrospective validation experiment.  
16 We firstly built a general linear model to convert the sequenced cfDNA profile as a quantitative  
17 measure of placenta development to predict pregnancy outcome, which showed a 100% accuracy  
18 to predict preeclampsia in this small cohort. Blood draws collected at 13-20w GA, originally for  
19 NIPT, from 159 pregnant females, in which 37 were of preeclampsia, were used to validate the  
20 model. Methylation profiles of these cfDNA were captured and sequenced. Pregnancy outcome  
21 prediction based on methylation haplotype profiling achieved a 97% sensitivity and 89%  
22 specificity in this cohort (Figure 6d). Post-hoc analysis showed that, starting from 13w GA, the

1 cfDNA methylation profile from females who latter developed preeclampsia was significantly  
2 delayed compared to normal ones (Figure 6e).

3 Finally, we prospectively collected blood draws from two females at their early pregnancy to  
4 perform methylation profiling. Consecutive blood draws from 13-17w GA showed stable  
5 methylation profile measurement (Figure 6f), suggesting that the evolution of methylation profile  
6 of placental genome might be largely finished at 13w GA. Furthermore, we found the measurement  
7 accurately predicted their pregnancy outcome (Figure 6g).

## 8 **Discussion and Conclusion**

9 Placenta, as the maternal-fetal interface, is essential for fetal development. Although it was known  
10 for decades that anatomical defective placental development underlies the pathogenesis of serious  
11 pregnancy complications such as fetal growth restriction and preeclampsia, their underlying  
12 molecular mechanism are largely unknown. Here we showed that preeclampsia is a disease  
13 associated with developmentally delayed placenta accompanied with failed epigenetic  
14 reprogramming characterized by specific DNA methylation and chromatin accessibility defects  
15 which together affected development of trophoblasts, and stalled the evolution of preeclampsia  
16 epigenome along its innate developmental trajectory. Application of low dose aspirin before 16w  
17 GA may protect 50-70% of early-onset preeclampsia incidence in high-risk groups. Our results  
18 does not only provided insights into preeclampsia etiology, but also provided a mean for accurate  
19 identification of these high risk female at early GA weeks.

20  
21  
22

## 1 **Author Contributions**

2 Y.Z. and A.H.Y conceived and designed the study. W.H., Y.W., X.L.G., J.X.Y, and Y.M.Q.  
3 collected clinical placenta and serum samples. Y.Z., K.L., X.H.W., and Y.X. arranged and  
4 collected clinical tumor and normal tissue samples. W.H. collected the clinical data for pregnant  
5 female, and set blinding for the validation cohort. W.J. collected the prospective prediction  
6 samples and their associated clinical data, performed table statistics on clinical data. Y.Z., Q.C.,  
7 W.H.C., K.W. and H.H.G. developed the *Tequila 7N* single-stranded methylation sequencing  
8 assay. W.J. and K.W. collected, dissected, and processed placenta samples for ATAC-seq. K.W.,  
9 L.L.L., L.Y.C., Q.C., J.L., Y.W.C. and W.H.C. collected, dissected, and processed placenta  
10 samples for methylation capture sequencing. K.W., L.L.L., L.Y.C., Q.C., J.L., Y.W.C., H.H.G.,  
11 Y.X. and W.H.C. collected, dissected, and processed tumor and normal tissue samples for  
12 methylation capture sequencing. K.W., L.L.L., L.Y.C., Q.C., J.L., Y.W.C. and W.H.C. processed  
13 plasma samples for methylation capture sequencing. Y.Z., L.Y.C., W.J.Z. and X.J.L. designed and  
14 implemented the methylation sequencing bioinformatic analysis pipeline. W.J.Z. performed the  
15 conservation analysis of methylation data between mouse and human. L.Y.C. and Y.Z. designed  
16 and implemented the methylation capture panel oligo design pipeline. L.Y.C. designed the  
17 methylation capture panel. L.L.L. produced and quality-controlled the methylation capture panel.  
18 Y.Z. designed and implemented the ATAC-seq and histone modification bioinformatic analysis  
19 pipelines. Y.Z. and W.J.Z. performed the single cell bioinformatic analysis. Y.Z. performed the  
20 TF footprint analysis. Y.Z., L.Y.C., and W.J.Z. built the statistical model for cell-free DNA  
21 methylation sequencing and performed analysis for the clinical validation test. Y.Z. and W.J wrote  
22 the paper with input from all authors.

1

## 2 **Acknowledgements**

3 The authors would like to thank Dr. Yi Rao for comments on the manuscript. This study is funded  
4 by National Key R&D Program of China (2016YFC1000700, 2016YFC1000703 to A.H.Y. and  
5 2016YFC1000400 to Y.W.), Department of Science and Technology of Guangdong Province  
6 (2016A030313787 to A.H.Y), and research fund from Euler Technology, Beijing, China.

7

## 8 **Conflict of interest declaration**

9 Provisional patents were filed for the single-stranded NGS library preparation method *Tequila 7N*  
10 (WO 2020/073748) and the method for using cell-free DNA methylation pattern to predict placenta  
11 development status and pregnancy outcome (202010084924.X).

12

13

14

## 1 Reference

- 2 1. Zhu, P. *et al.* Single-cell DNA methylome sequencing of human preimplantation embryos.  
3 *Nat. Genet.* **50**, 12–19 (2018).
- 4 2. Xia, W. *et al.* Resetting histone modifications during human parental-to-zygotic transition.  
5 *Science (80-. )*. **365**, 353–360 (2019).
- 6 3. Zhou, F. *et al.* Reconstituting the transcriptome and DNA methylome landscapes of  
7 human implantation. *Nature* **572**, 660–664 (2019).
- 8 4. Wu, J. *et al.* Chromatin analysis in human early development reveals epigenetic transition  
9 during ZGA. *Nature* **557**, 256–260 (2018).
- 10 5. Gao, L. *et al.* Chromatin Accessibility Landscape in Human Early Embryos and Its  
11 Association with Evolution. *Cell* **173**, 248–259.e15 (2018).
- 12 6. Liu, L. *et al.* An integrated chromatin accessibility and transcriptome landscape of human  
13 pre-implantation embryos. *Nat. Commun.* **10**, 1–11 (2019).
- 14 7. Ziller, M. J. *et al.* Charting a dynamic DNA methylation landscape of the human genome.  
15 *Nature* **500**, 477–481 (2013).
- 16 8. Guo, H. *et al.* The DNA methylation landscape of human early embryos. *Nature* **511**,  
17 606–610 (2014).
- 18 9. Lu, F. *et al.* Establishing chromatin regulatory landscape during mouse preimplantation  
19 development. *Cell* **165**, 1375–1388 (2016).
- 20 10. De Iaco, A. *et al.* DUX-family transcription factors regulate zygotic genome activation in  
21 placental mammals. *Nat. Genet.* **49**, 941–945 (2017).
- 22 11. Ernst, J. & Kellis, M. ChromHMM: Automating chromatin-state discovery and  
23 characterization. *Nat. Methods* **9**, 215–216 (2012).
- 24 12. Ernst, J. & Kellis, M. Chromatin-state discovery and genome annotation with  
25 ChromHMM. *Nat. Protoc.* **12**, 2478–2492 (2017).
- 26 13. Chen, Z., Yin, Q., Inoue, A., Zhang, C. & Zhang, Y. Allelic H3K27me3 to allelic DNA  
27 methylation switch maintains noncanonical imprinting in extraembryonic cells. *Sci. Adv.*  
28 **5**, (2019).
- 29 14. van Heeringen, S. & Akkers, R. Principles of nucleation of H3K27 methylation during  
30 embryonic development. *Genome Res.* **24**, 401–410 (2014).
- 31 15. Zheng, H. *et al.* Resetting Epigenetic Memory by Reprogramming of Histone  
32 Modifications in Mammals. *Mol. Cell* **63**, 1066–1079 (2016).
- 33 16. Saxena, M. *et al.* Transcription factor-dependent ‘anti-repressive’ mammalian enhancers  
34 exclude H3K27me3 from extended genomic domains. *Genes Dev.* **31**, 2391–2404 (2017).
- 35 17. Smith, Z. D. *et al.* Epigenetic restriction of extraembryonic lineages mirrors the somatic

- 1 transition to cancer. *Nature* **549**, 543–547 (2017).
- 2 18. Lyall, F., Robson, S. C. & Bulmer, J. N. Spiral artery remodeling and trophoblast invasion  
3 in preeclampsia and fetal growth restriction relationship to clinical outcome. *Hypertension*  
4 **62**, 1046–1054 (2013).
- 5 19. Tomas, S. Z., Prusac, I. K., Roje, D. & Tadin, I. Trophoblast apoptosis in placentas from  
6 pregnancies complicated by preeclampsia. *Gynecol. Obstet. Invest.* **71**, 250–255 (2011).
- 7 20. Maynard, S. E. *et al.* Excess Placental Soluble fms-like Hypertension , and Proteinuria in  
8 preeclampsia. *J. Clin. Invest.* **111**, 649–58 (2003).
- 9 21. Wisner, K. Gestational Hypertension and Preeclampsia. *MCN Am. J. Matern. Nurs.* **44**,  
10 170 (2019).
- 11 22. Vento-Tormo, R. *et al.* Single-cell reconstruction of the early maternal–fetal interface in  
12 humans. *Nature* **563**, 347–353 (2018).
- 13 23. Molaro, A. *et al.* Sperm methylation profiles reveal features of epigenetic inheritance and  
14 evolution in primates. *Cell* **146**, 1029–1041 (2011).
- 15 24. Gamage, T. K. J. B. *et al.* Human trophoblasts are primarily distinguished from somatic  
16 cells by differences in the pattern rather than the degree of global CpG methylation. *Biol.*  
17 *Open* **7**, (2018).
- 18 25. Bianco-Miotto, T. *et al.* Recent progress towards understanding the role of DNA  
19 methylation in human placental development. *Reproduction* **152**, R23–R30 (2016).
- 20 26. Macintire, K. *et al.* PAPP2 is increased in severe early onset pre-eclampsia and  
21 upregulated with hypoxia. *Reprod. Fertil. Dev.* **26**, 351–357 (2014).
- 22 27. Zeisler, H. *et al.* Predictive value of the sFlt-1:PIGF ratio in women with suspected  
23 preeclampsia. *N. Engl. J. Med.* **374**, 13–22 (2016).
- 24 28. McGinnis, R. *et al.* Variants in the fetal genome near FLT1 are associated with risk of  
25 preeclampsia. *Nat. Genet.* **49**, 1255–1260 (2017).
- 26 29. Low, P. & Variants, F. Protective low frequency variants for preeclampsia in the FLT1  
27 gene in the Finnish population. **70**, 365–371 (2018).
- 28 30. Amin-Beidokhti, M. *et al.* An intron variant in the FLT1 gene increases the risk of  
29 preeclampsia in Iranian women. *Clin. Exp. Hypertens.* **41**, 697–701 (2019).
- 30 31. Stewart, C. L., Kaspart, P. & Brunet, L. J. Blastocyst Implantation Depends on Maternal  
31 Expression of Leukaemia Inhibitory Factor. *Nature* **2664**, 265–268 (1992).
- 32 32. Adelman, D. M., Gertsenstein, M., Nagy, A., Simon, M. C. & Maltepe, E. Placental cell  
33 fates are regulated in vivo by HIF-mediated hypoxia responses. *Genes Dev.* **14**, 3191–  
34 3203 (2000).
- 35 33. Fan, X. *et al.* Endometrial VEGF induces placental sFLT1 and leads to pregnancy  
36 complications. *J. Clin. Invest.* **124**, 4941–4952 (2014).



- 1 34. Shore, V. H. *et al.* Vascular endothelial growth factor, placenta growth factor and their  
2 receptors in isolated human trophoblast. *Placenta* **18**, 657–665 (1997).
- 3 35. Wang, H. Y., Zhang, Z. & Yu, S. Expression of PAPP2 in human fetomaternal interface  
4 and involvement in trophoblast invasion and migration. *Genet. Mol. Res.* **15**, 1–16 (2016).
- 5 36. Ashar-Patel, A. *et al.* FLT1 and transcriptome-wide polyadenylation site (PAS) analysis in  
6 preeclampsia. *Sci. Rep.* **7**, 1–14 (2017).
- 7 37. Thomas, C. P., Andrews, J. I. & Liu, K. Z. Intronic polyadenylation signal sequences and  
8 alternate splicing generate human soluble Flt1 variants and regulate the abundance of  
9 soluble Flt1 in the placenta. *FASEB J.* **21**, 3885–3895 (2007).
- 10 38. Corces, M. R. *et al.* The chromatin accessibility landscape of primary human cancers.  
11 *Science* (80-. ). **362**, (2018).
- 12 39. Li, Z. & Schulz, M. Identification of transcription factor binding sites using Gaussian  
13 mixture models. *Genome Biol.* **31**, 70–80 (2014).
- 14 40. Turco, M. Y. *et al.* Trophoblast organoids as a model for maternal–fetal interactions  
15 during human placentation. *Nature* **564**, 263–281 (2018).
- 16 41. Lyall, F., Bulmer, J. N., Kelly, H., Duffie, E. & Robson, S. C. Human trophoblast invasion  
17 and spiral artery transformation. The role of nitric oxide. *Am. J. Pathol.* **154**, 1105–1114  
18 (1999).
- 19 42. Qiu, X. *et al.* Reversed graph embedding resolves complex single-cell trajectories. *Nat.*  
20 *Methods* **14**, 979–982 (2017).
- 21 43. Garrido-Gomez, T. *et al.* Severe pre-eclampsia is associated with alterations in  
22 cytotrophoblasts of the smooth chorion. *Dev.* **144**, 767–777 (2017).
- 23 44. Tian, F. J. *et al.* The YY1/MMP2 axis promotes trophoblast invasion at the maternal–fetal  
24 interface. *J. Pathol.* **239**, 36–47 (2016).
- 25 45. Inoue, A., Jiang, L., Lu, F., Suzuki, T. & Zhang, Y. Maternal H3K27me3 controls DNA  
26 methylation-independent imprinting. *Nature* **547**, 419–424 (2017).
- 27 46. Nizyaeva, N. V. *et al.* Ultrastructural and Immunohistochemical Features of Telocytes in  
28 Placental Villi in Preeclampsia. *Sci. Rep.* **8**, 1–15 (2018).
- 29 47. Lui, Y. Y. N. *et al.* Predominant hematopoietic origin of cell-free dna in plasma and serum  
30 after sex-mismatched bone marrow transplantation. *Clin. Chem.* **48**, 421–427 (2002).
- 31 48. Dennis Lo, Y. M. *et al.* Presence of fetal DNA in maternal plasma and serum. *Lancet* **350**,  
32 485–487 (1997).
- 33 49. Tsui, D. W. Y., Chiu, R. W. K. & Dennis Lo, Y. M. Epigenetic approaches for the  
34 detection of fetal DNA in maternal plasma. *Chimerism* **1**, 30–35 (2010).
- 35 50. Tong, Y. K. *et al.* Noninvasive prenatal detection of trisomy 21 by an epigenetic-genetic  
36 chromosome-dosage approach. *Clin. Chem.* **56**, 90–98 (2010).

1

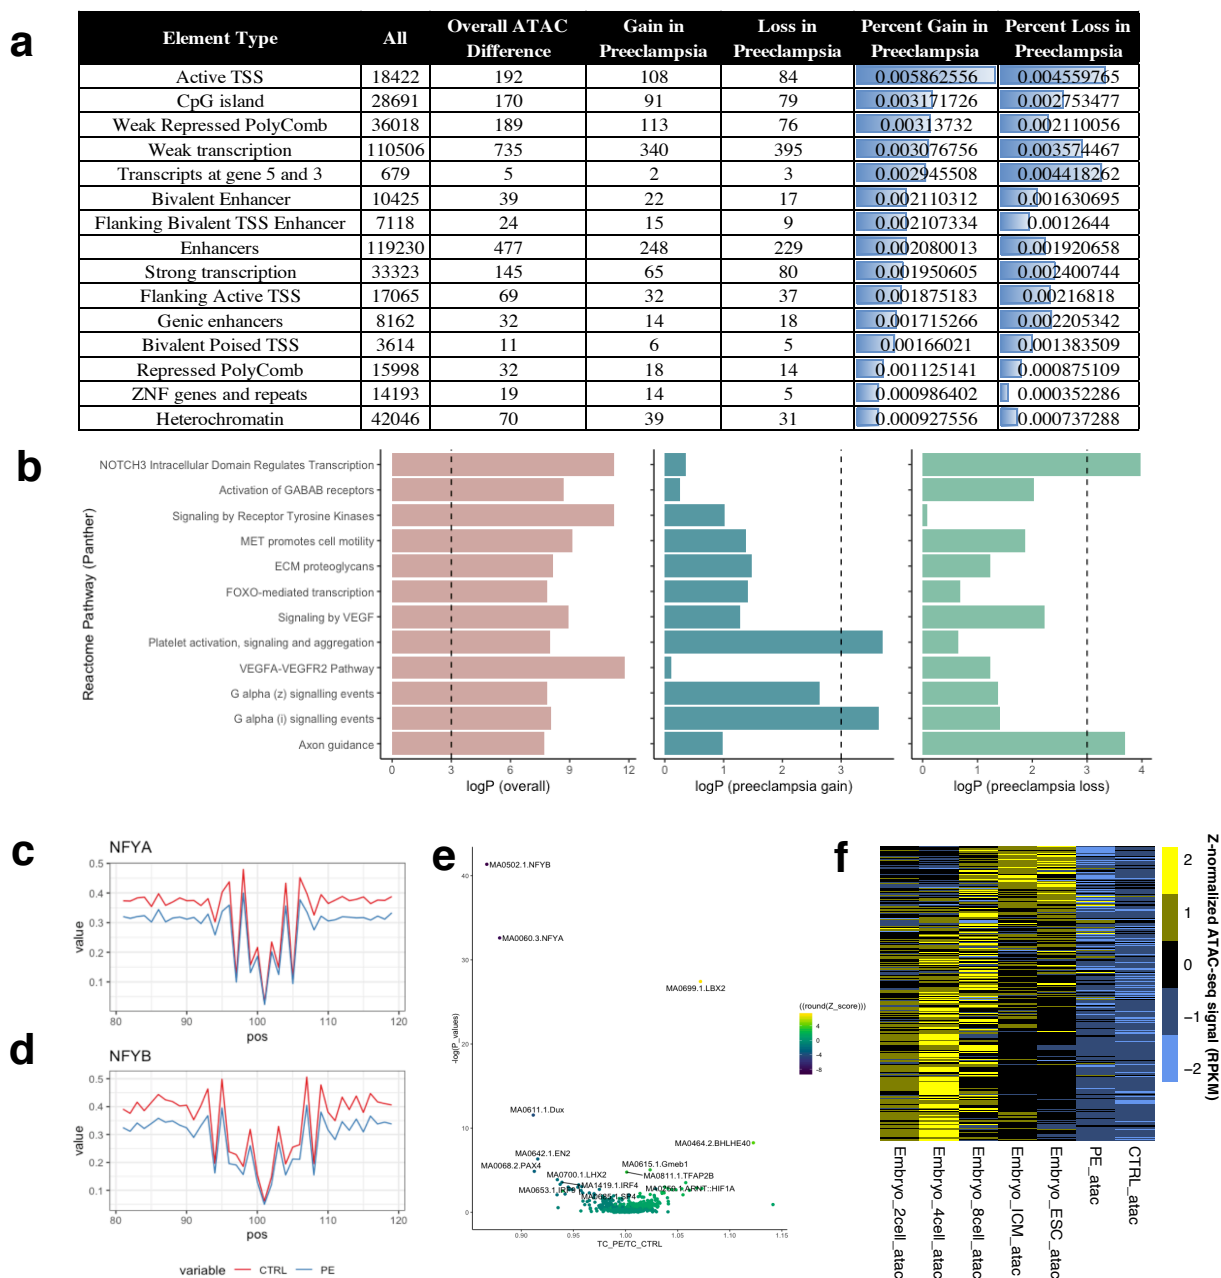

2

3 Figure 1: Chromatin accessibility of preeclampsia placenta showed bimodal defects associated  
4 with specific developmental stage

5 a). Enrichment of significantly different ATAC-seq peaks on different classes of<sup>11,12</sup> chromHMM  
6 genomic regions. b). Enrichment of significantly ATAC-seq peaks on Reactome Pathways from  
7 PantherDB. Significantly enriched pathway with FDR < 0.01 were shown on the figure. X axis:  
8 log P value (unadjusted); dashed line: P=0.001. Left/pink: gene pathways associated with peaks  
9 with significant differences; Middle/dark green: genes associated with preeclampsia-gained peaks;  
10 Right/olive: genes associated with preeclampsia-lost peaks. c). Transcription factor footprint of

1 NFYA is significantly decreased in preeclampsia. X axis: position (100=TF binding site) around  
2 the TF binding site for NFYA; Y axis: normalized read depth; Red: non-preeclampsia (CTRL)  
3 placenta; Blue: preeclampsia (PE) placenta. d). Transcription factor footprint of NFYB is  
4 significantly decreased in preeclampsia; X axis: position (100=TF binding site) around the TF  
5 binding site for NFYB; Y axis: normalized read depth; Red: non-preeclampsia (CTRL) placenta;  
6 Blue: preeclampsia (PE) placenta. e). Scatter plot denoting the ratio of TF footprint strength for  
7 preeclampsia over normal placenta (X-axis) and P-value (Y-axis) for TF binding differences on  
8 placenta. X axis: Difference of read depth ratio of preeclampsia-vs.-non-preeclampsia placenta; Y  
9 axis: log P value. Color hue: Z from -8 to 4. f). Z-normalized ATAC signal (RPKM) intensity  
10 across embryonic stages on IDR peaks showed differences between preeclampsia and non-  
11 preeclampsia placenta.

12

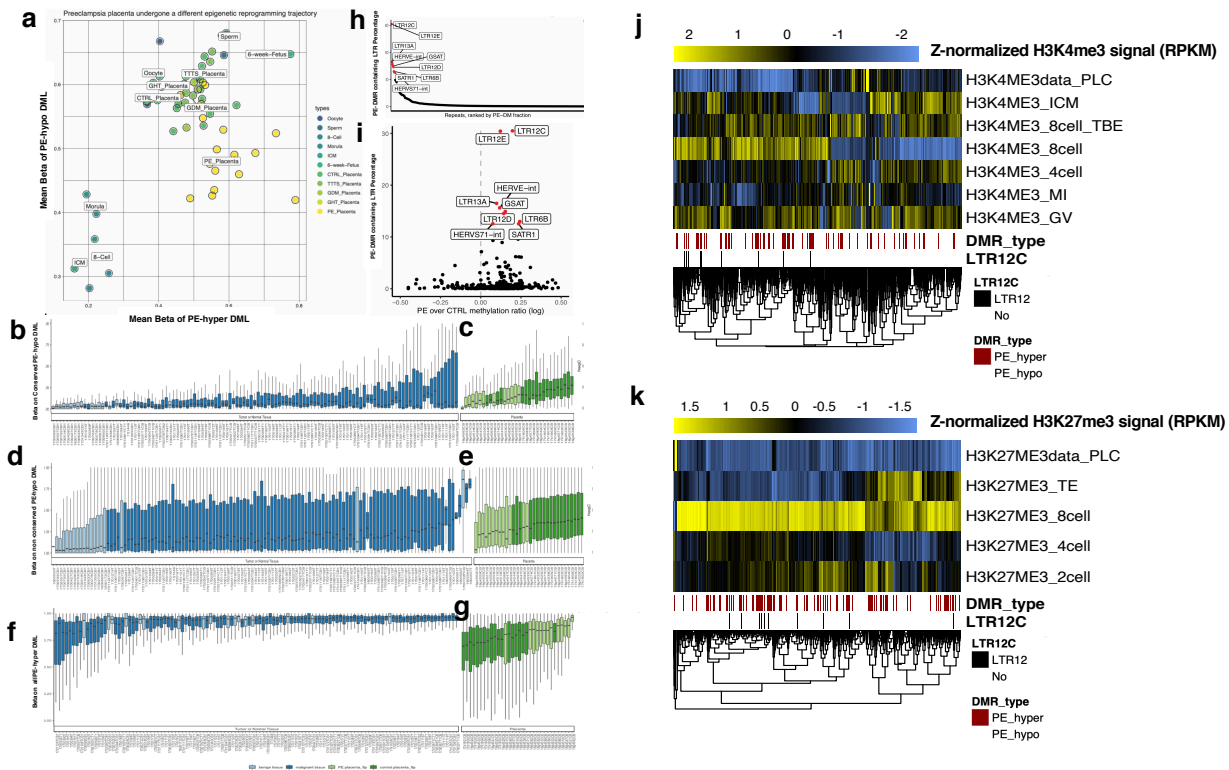

1

2 Figure 2: Bimodal genome-wide methylation defects associated with preeclampsia

3 a). Mean methylation level (beta) of PE-hyper (X) and PE-hypo (Y) loci distinguishes  
 4 preeclampsia samples from other non-preeclampsia placenta and embryo samples. Color: samples  
 5 of different embryonic stages or types of placenta. GHT: gestational hypertension; GDM:  
 6 gestational diabetes; TTTs: twin-twin transfusion syndrome; PE: preeclampsia; b-c). Box-and-  
 7 whisker plot of methylation level (beta) of mammalian conserved PE-hypo DML on individual  
 8 samples; light blue: normal samples; dark blue: tumor samples. light green: preeclampsia fetal  
 9 surface placenta samples; dark green: normal fetal surface placenta samples. d-e) Box-and-whisker  
 10 plot of methylation DML level (beta) of non-conserved, human-specific PE-hypo DML on individual  
 11 samples; light blue: normal samples; dark blue: tumor samples. light green: preeclampsia fetal  
 12 surface placenta samples; dark green: normal fetal surface placenta samples. f-g) Box-and-whisker  
 13 plot of methylation level (beta) of all PE-hyper DML on individual samples; light blue: normal  
 14 samples; dark blue: tumor samples. light green: preeclampsia fetal surface placenta samples; dark  
 15 green: normal fetal surface placenta samples. h). LTR12 retrotransposon family were the most  
 16 affected repeat element in preeclampsia placenta. Y-axis: Percentage of repeat element containing  
 17 preeclampsia-specific DMR; X-axis: rank of percentage from high to low; Red dots with names  
 18 are repeats with significant enrichment (Fisher's exact test  $P < 0.05$ ) of DMR j). LTR12 family  
 19 retrotransposon are hypermethylated in preeclampsia placenta. X-axis: log-ratio of mean  
 20 methylation level of preeclampsia placenta over normal placenta for individual class of repeat  
 21 element; Y-axis: Fractions of repeats containing preeclampsia-specific DMR. Red dots with names  
 22 are repeats with significant enrichment (Fisher's exact test  $P < 0.05$ ) of DMR. j). Z-normalized  
 23 H3K4me3 Cut-and-Run signal (RPKM) within  $\pm 100$ bp of preeclampsia-specific DMR across  
 24 different embryonic stages and placenta samples showed transcriptional-dependent enrichment of  
 25 H3K4me3 mark on preeclampsia-hyper and LTR12C DMR in 8-cell-stage. PLC: Placenta; ICM:

1 inner cell mass; TBE: transcriptional block; MI: meiosis I oocyte; GV: geminal vesicle. k). Z-  
2 normalized H3K27me3 Cut-and-Run signal (RPKM) +/- 10000bp of preeclampsia-specific DMR  
3 across different embryonic stages and placenta samples showed exclusion of H3K27me3 mark on  
4 preeclampsia-hyper and LTR12C DMR in trophoctoderm. PLC: Placenta; TE: trophoctoderm.  
5 Black lines: LTR12C-contained DMR; Red lines: preeclampsia-hyper DMR;

6

7

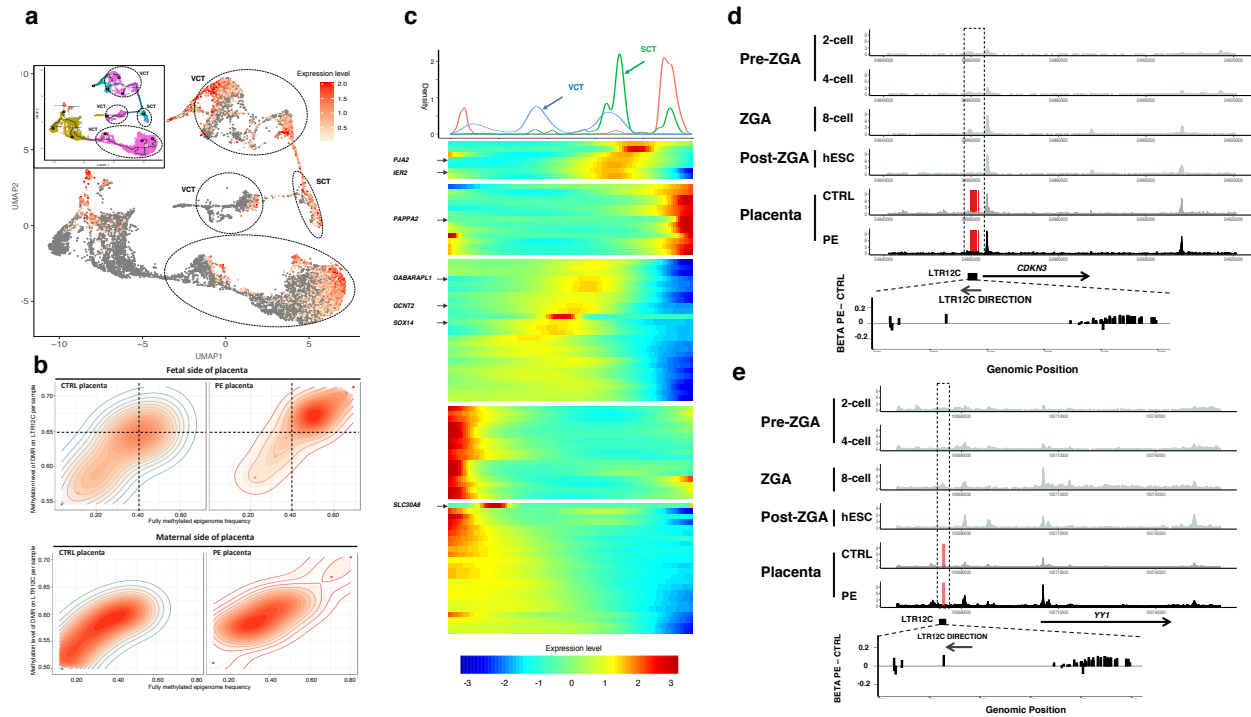

1

2 Figure 3: Genomic region hypermethylated in preeclampsia placenta are associated with VCT-  
 3 and SCT-specific genes and ZGA-active retrotransposon

4 a). UMAP projection and pseudotime trajectory (black) of single-cell RNA sequencing results of  
 5 trophoblasts. Heat color denotes sum of preeclampsia-hyper DMR associated gene expression  
 6 level in each cell. Inset: color-coded classes of trophoblasts. pink: VCT; blue: SCT; yellow:  
 7 EVT; red: decidua EVT. b). Preeclampsia-hyper DMR methylation level (Y) and fully-  
 8 methylated DNA read frequency (X) are different between preeclampsia and normal placenta on  
 9 the fetal, but not maternal surface. Individual placenta samples were denoted as dots, and 2-d  
 10 distribution were outlined. c). Gene expression level modelled on pseudotime trajectory for  
 11 preeclampsia-hyper DMR associated genes. Top: distribution of cells at different timepoints (x-  
 12 axis) of pseudotime. Blue: VCT; Red: EVT; Green: SCT. d). ATAC-seq of 2-cell, 4-cell, 8-cell,  
 13 primed-ESC, preeclampsia (PE) and normal (CTRL) placenta on CDKN3 loci. Red background  
 14 denotes DMR location. Dashed box denotes a preeclampsia-hypermethylated LTR12C in  
 15 CDKN3 which is transcriptionally activated at early-ZGA (8-cell). Lower panel: methylation  
 16 level difference of CpG in the LTR12C element, between preeclampsia and normal placenta.  
 17 Direction of LTR12C were denoted as arrow. e). ATAC-seq of 2-cell, 4-cell, 8-cell, primed-  
 18 ESC, preeclampsia (PE) and normal (CTRL) placenta on YY1 loci. Red background denotes  
 19 DMR location. Dashed box denotes a preeclampsia-hypermethylated LTR12C in YY1 which is  
 20 transcriptionally activated at early-ZGA (8-cell). Lower panel: methylation level difference of  
 21 CpG in the LTR12C element, between preeclampsia and normal placenta. Direction of LTR12C  
 22 were denoted as arrow.

23

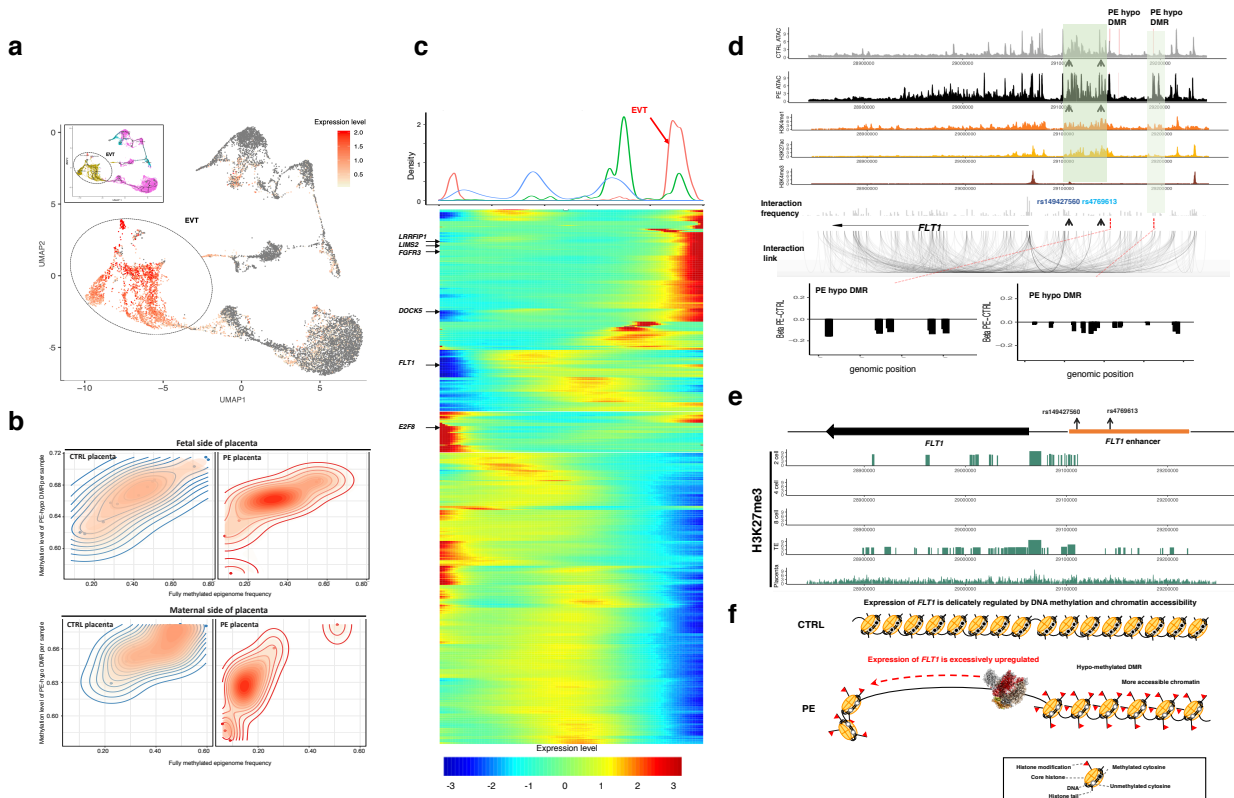

1

2 Figure 4: Post-ZGA-active, embryonically protected CpG island promoters associated with EVT-  
 3 specific genes were hypomethylated in preeclampsia placenta

4 a). UMAP projection and pseudotime trajectory (black) of single-cell RNA sequencing results of  
 5 trophoblasts. Heat color denotes sum of preeclampsia-hypo DMR associated gene expression  
 6 level in each cell. Inset: color-coded classes of trophoblasts. pink: VCT; blue: SCT; yellow:  
 7 EVT; red: decidua EVT. b). Preeclampsia-hypo DMR methylation level (Y) and fully-  
 8 methylated DNA read frequency (X) are different between preeclampsia and normal placenta on  
 9 the maternal, but not fetal surface. Individual placenta samples were denoted as dots, and 2-d  
 10 distribution were outlined. c). Gene expression level modelled on pseudotime trajectory for  
 11 preeclampsia-hypo DMR associated genes. Top: distribution of cells at different timepoints (x-  
 12 axis) of pseudotime. Blue: VCT; Red: EVT; Green: SCT. d). ATAC-seq of preeclampsia (PE)  
 13 and normal (CTRL) placenta, and associated H3K4me3, H3K27ac, H3K4me1 modification  
 14 ChIP-seq signal on *FLT1* loci. Red dashed line denotes preeclampsia-hypo DMR location. Green  
 15 shadow box denotes a preeclampsia-gained enhancer for *FLT1*. Positions for variants associated  
 16 with increased risk for preeclampsia were denoted. Middle panel: Chromatin interaction intensity  
 17 (gray histogram) and individual chromatin interaction links (bottom curves) on the region,  
 18 showing that the preeclampsia-gained enhancer interacts with poised and regular promoter of  
 19 *FLT1*. Lower panel: methylation level difference of CpG in the preeclampsia-hypo DMR,  
 20 between preeclampsia and normal placenta. e). H3K27me3 modification (Cut-and-Run for  
 21 embryo, and ChIP-seq for placenta) level on the same region, showing that the preeclampsia-  
 22 gained enhancer was under control of PcG and marked by H3K27me3 at trophectoderm stage. f).  
 23 Schematic drawing for epigenetic mechanism controlling *FLT1* overexpression in preeclampsia.

24

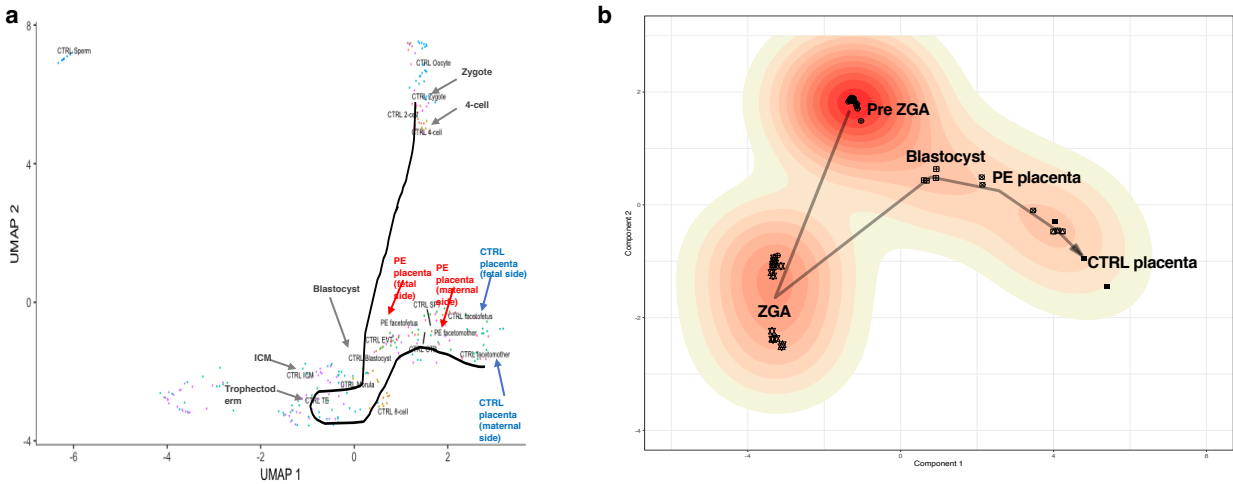

1

2 Figure 5: Stalled placenta epigenome development in preeclampsia

3 a). UMAP and pseudotime trajectory for single cell and bulk tissue methylome sequencing from  
 4 different embryonic stages to placenta, showing that preeclampsia placentas are stalled *en route*  
 5 of the trajectory from blastocyst to trophoblast. b). UMAP and pseudotime trajectory for single  
 6 cell and bulk tissue ATAC sequencing from different embryonic stages to placenta, showing that  
 7 preeclampsia placentas are stalled *en route* of the trajectory from blastocyst to trophoblast.

8

9

10



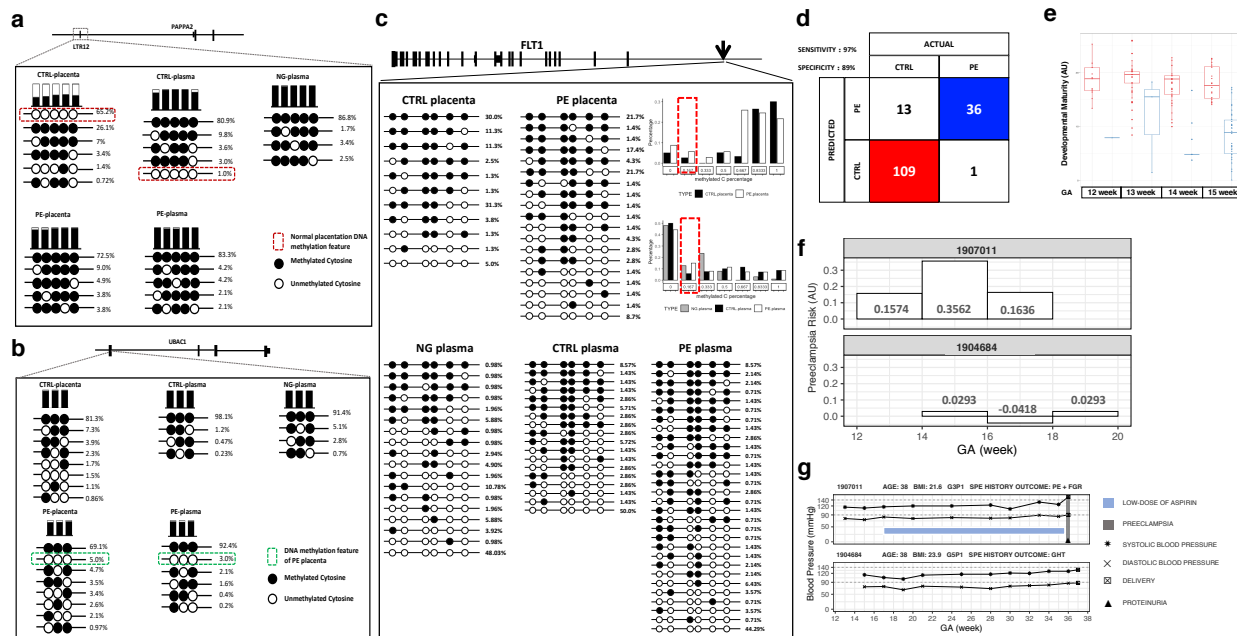

1  
 2 **Figure 6: In vivo evidence for the early stalled development of placenta in cell-free DNA**  
 3 **a).** Normal pregnancy associated methylation haplotype on a preeclampsia-hyper DMR on  
 4 LTR12C element 5' of PAPA2 could be detected in cell-free DNA. Mean methylation level  
 5 (beta: top columns. black: methylated, white: unmethylated), individual CpG-loci methylation  
 6 combinations on DNA sequencing reads (methylation haplotype, bottom panels) and associated  
 7 frequency of each methylation haplotype (figures on the right) were shown for control placenta,  
 8 preeclampsia placenta, control pregnant female, preeclampsia pregnant female, and nongravid  
 9 female. Red dashed box denotes the normal pregnancy associated methylation haplotype which  
 10 could only be found in placenta or cell-free DNA from control pregnant female. **b).** Preeclampsia  
 11 pregnancy associated methylation haplotype on a preeclampsia-hypo DMR 5' of UBAC1 could  
 12 be detected in cell-free DNA. Green dashed box denotes the preeclampsia pregnancy associated  
 13 methylation haplotype which could only be found in placenta or cell-free DNA from  
 14 preeclampsia pregnant female. **c).** Preeclampsia-specific methylation haplotypes with lower  
 15 methylation level (statistics in inset bar graphs) on FLT1 preeclampsia-specific enhancer  
 16 detected in cell-free DNA. **d).** Sensitivity and specificity in blinded validation for predicting  
 17 preeclampsia with cell-free DNA methylation haplotype in a retrospective cohort. **e).** Post-hoc  
 18 analysis showing predicted placenta developmental maturity is lower in preeclampsia individuals  
 19 at early GA weeks. (Y-axis) Predicted placenta developmental maturity with cell-free DNA  
 20 methylation haplotype from female who latter developed preeclampsia (blue) or normal (red).  
 21 (X-axis) GA weeks. **f).** Prospective prediction of preeclampsia risk (Y-axis) from consecutive  
 22 blood draws of two volunteers. **g).** Clinical outcome of the two volunteers, showing that the  
 23 methylation haplotype deduced preeclampsia risk could predict final clinical outcome.

24
